# Supplementary material for: Thermomechanical properties of metal–organic framework HKUST-1 crystals
Source: Royal Society of Chemistry journal article supplement (doi:10.1039/d3ta08059e), 2024-01-01
Supplement: d3ta08059e3.pdf [file d3ta08059e3.pdf]

## Supporting Information

### Thermomechanical properties of metal-organic framework

#### HKUST-1 crystals

Bing Wang<sup>||</sup>, Jin Ke<sup>||</sup>, Jin Zhang\*

School of Science, Harbin Institute of Technology, Shenzhen 518055, PR China

<sup>||</sup>Contributed equally.

\*Corresponding author. E-mail address: [jinzhang@hit.edu.cn](mailto:jinzhang@hit.edu.cn) (J. Zhang).

#### Debye temperature of HKUST-1

According to the Debye theory,<sup>S1</sup> the Debye temperature  $\theta_D$  corresponds to the temperature of the highest normal mode of vibration of the HKUST-1 crystal, i.e., the highest temperature that can be obtained due to a single normal vibration. Mathematically, the Debye temperature is given by

$$\theta_D = \frac{h\nu_m}{k_B}, \quad (\text{S1})$$

where  $h$  is the Planck's constant,  $\nu_m$  is the Debye frequency, and  $k_B$  is the Boltzmann's constant.

#### Linear temperature dependence of the Young's modulus

Wachtman et al. proposed the following equation for the Young's modulus  $E$  at different temperatures:<sup>S2</sup>

$$E = E_0 - B \exp(-T_0/T), \quad (\text{S2})$$

where  $E_0$  is the Young's modulus at absolute zero,  $T$  is the temperature,  $B$  is an arbitrary constant that depends on the Grüneisen constant, and  $T_0$  is another constant related to the Debye temperature.

Based on the Taylor series expansion, Equation S2 can be rewritten as:

$$E = E_0 - BT \left[ 1 - \frac{T_0}{T} + \frac{1}{2} \left( \frac{T_0}{T} \right)^2 - \frac{1}{6} \left( \frac{T_0}{T} \right)^3 + \dots \right], \quad (\text{S3})$$

Considering the fact that the temperature considered in the compression tests is much larger than  $T_0$ , the higher-order terms in Equation S3 can be approximately ignored. Thus, we obtained the following linear temperature dependence of the Young's modulus and hardness:

$$E = E_0 + BT_1 - BT. \quad (\text{S4})$$

### Definition of the strain in the strain-fluctuation method

The strain  $\varepsilon_{ij}$  has the following definition, which is a widely used method introduced previously.<sup>S3,S4</sup>

$$\varepsilon_{ij} = \frac{1}{2} \left[ \langle h \rangle_{ik}^{-T} h_{kl}^T h_{lm} \langle h \rangle_{mj}^{-1} - \delta_{ij} \right]. \quad (\text{S5})$$

Here,  $h_{ij} = \{\mathbf{a}, \mathbf{b}, \mathbf{c}\}_{ij}$  is a matrix with components of the principal axes ( $\mathbf{a}$ ,  $\mathbf{b}$  and  $\mathbf{c}$ ) of the simulation box, which can be extracted from MD simulations and has the ability to describe the size and shape of the simulation box. The matrix  $\langle h \rangle_{ij}$  describes the average shape of the system as the reference state.  $\langle h \rangle_{ij}^{-T}$  is the inverse of the transpose of  $\langle h \rangle_{ij}$ .  $\delta_{ij}$  is the Kronecker tensor.

### References

- (S1) Hill, T. L. *An Introduction to Statistical Thermodynamics*. New York: Dover, 1986.
- (S2) Wachtman, J. B.; Tefft, W. E.; Lam, D. G.; Apstein, C. S. Exponential temperature dependence of Young's modulus for several oxides. *Phys. Rev.* 1961, 122, 1754-1759.

(S3) Parrinello, M.; Rahman, A. Strain fluctuations and elastic constants. *J. Chem. Phys.* 1982, 76, 2662-2666.

(S4) Rogge, S. M. J.; Waroquier, M.; Van Speybroeck, V. Reliably modeling the mechanical stability of rigid and flexible metal-organic frameworks. *Acc. Chem. Res.* 2018, 51, 138-148.

Supplementary figures

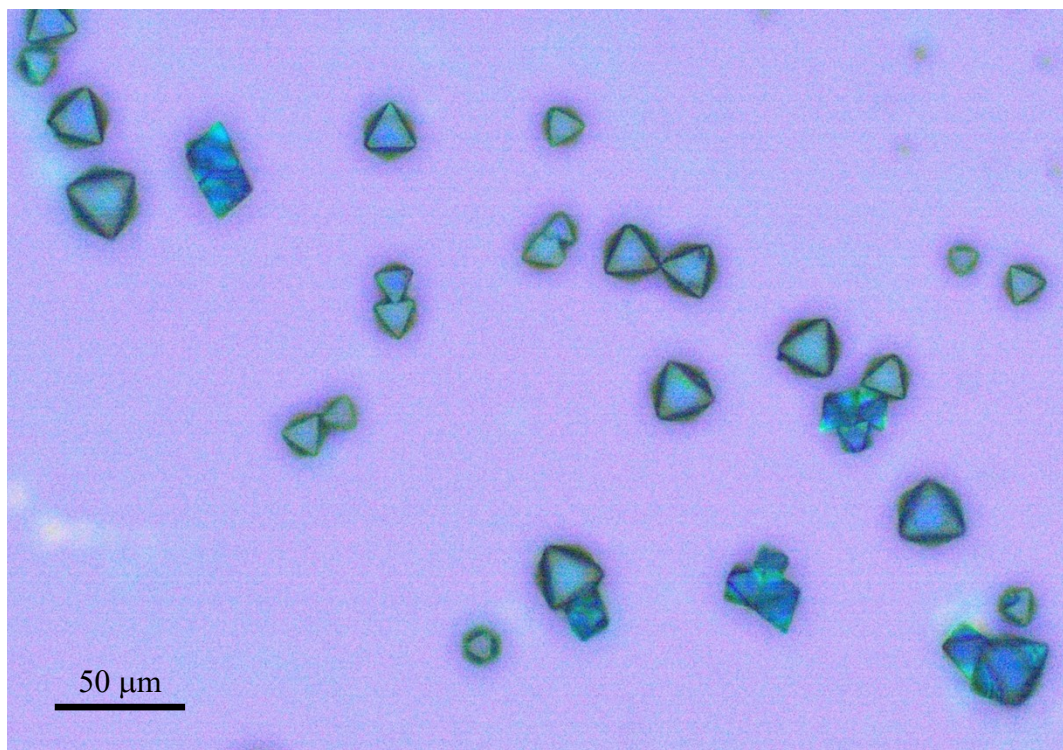

**Figure S1.** Optical microscope images of the synthesised HKUST-1 crystals.

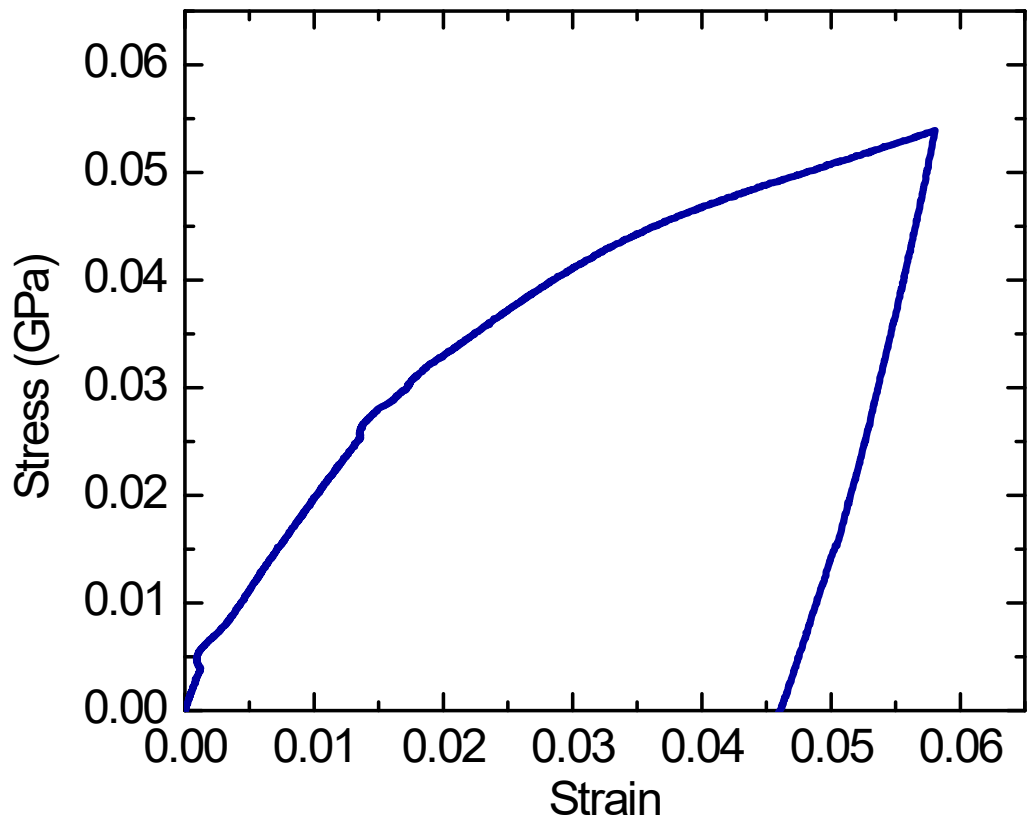

**Figure S2.** Stress versus strain plot for the compression of crystals at the temperature of 175 °C.

Here a relatively small stress was applied.

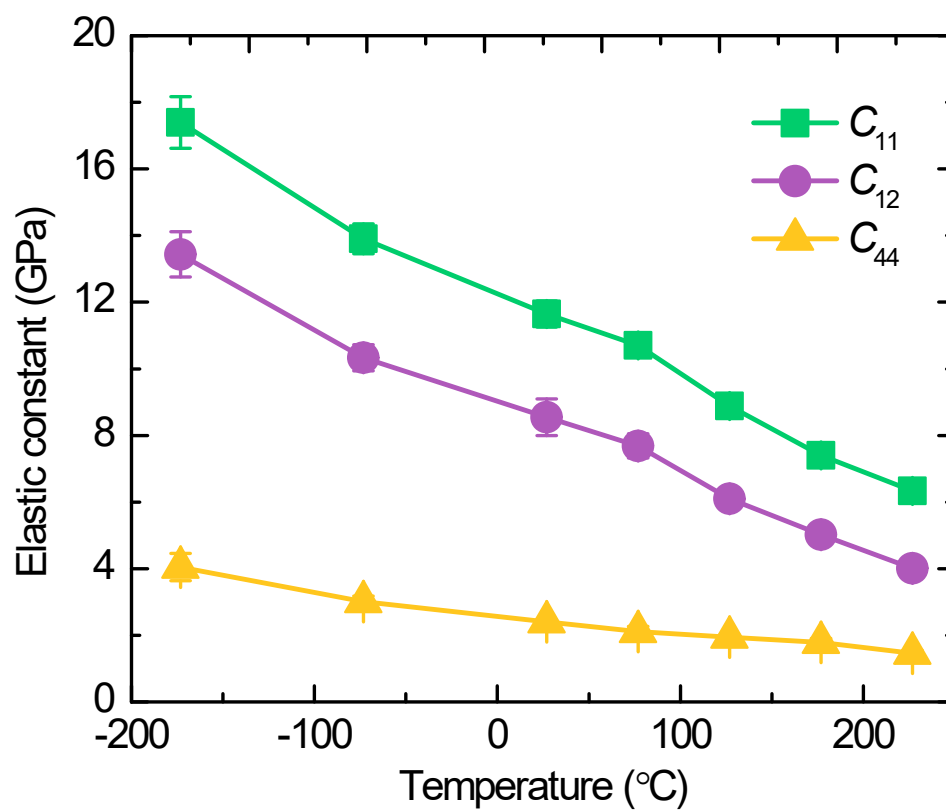

**Figure S3.** Elastic constants of crystalline HKUST-1 at various temperatures.

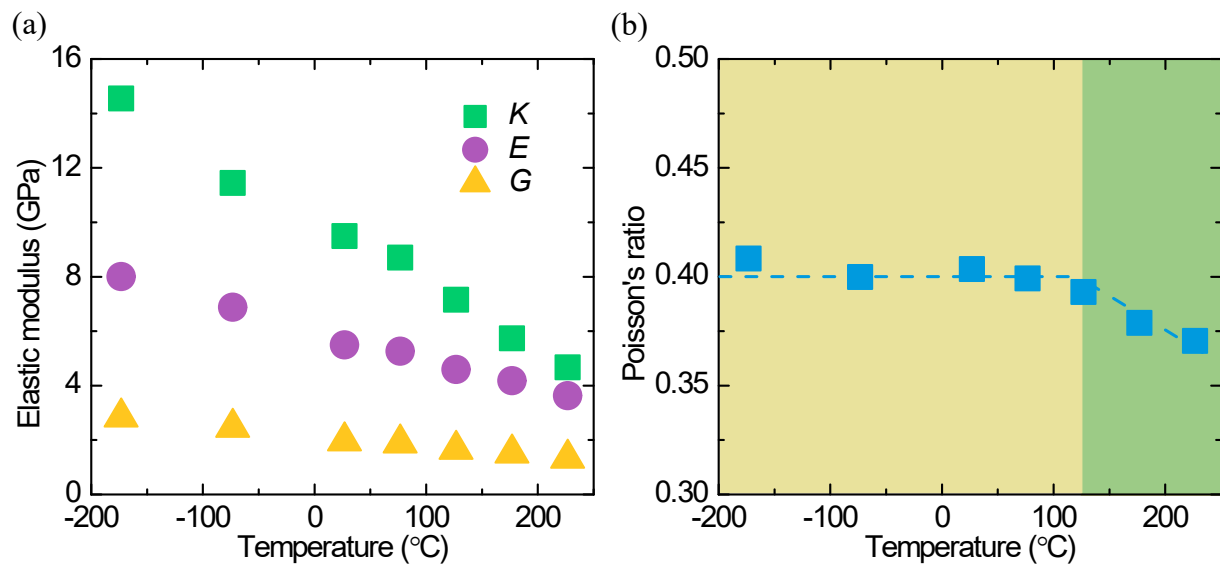

**Figure S4.** Elastic properties of the crystalline HKUST-1 at various temperatures ranging from  $-173$  °C to  $227$  °C, predicted from the strain-fluctuation method. (a) The bulk modulus  $K$ , Young's modulus  $E$ , shear modulus  $G$  and (b) the Poisson's ratio. Here, the dashed line is drawn to guide the eye.

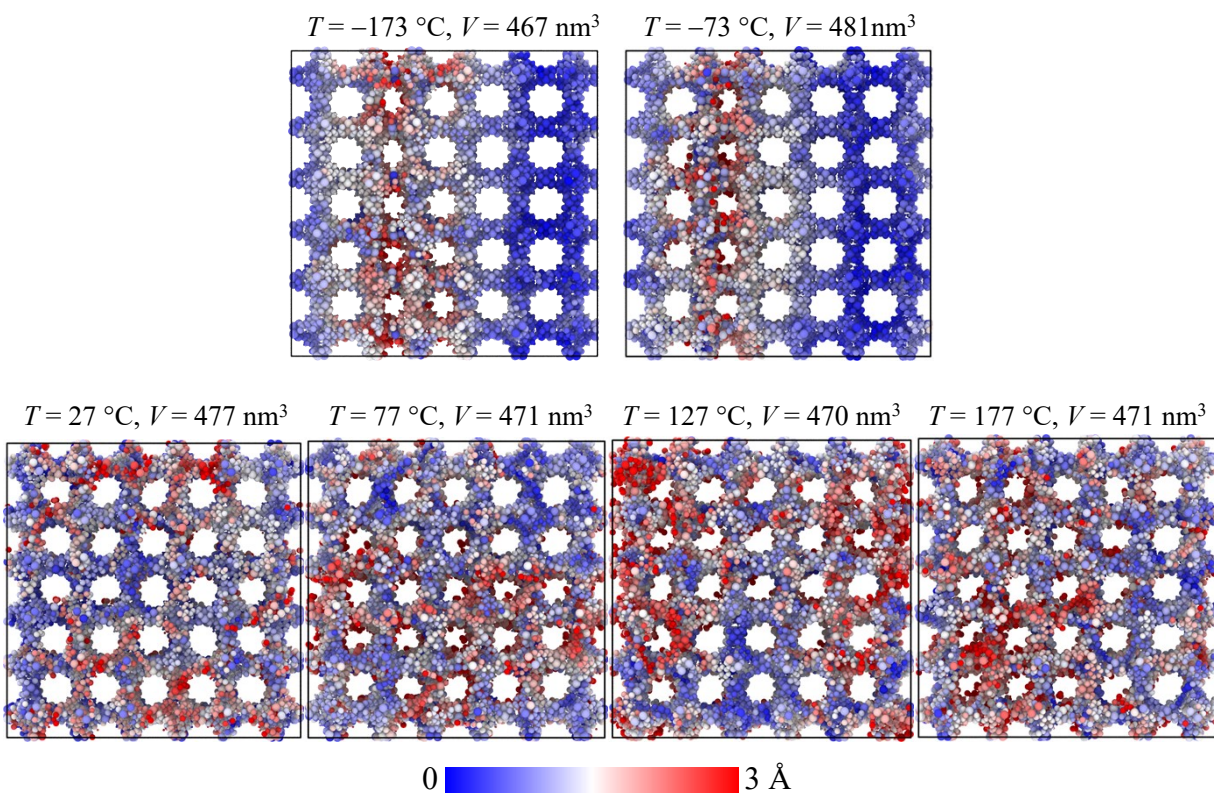

**Figure S5.** Structures and atomic displacements of metastable structures of HKUST-1 simulated at different temperatures ( $T$ ). Here, the metastable structures were extracted from the structures with the volumes ( $V$ ) at the negative slopes in Figure 5a.



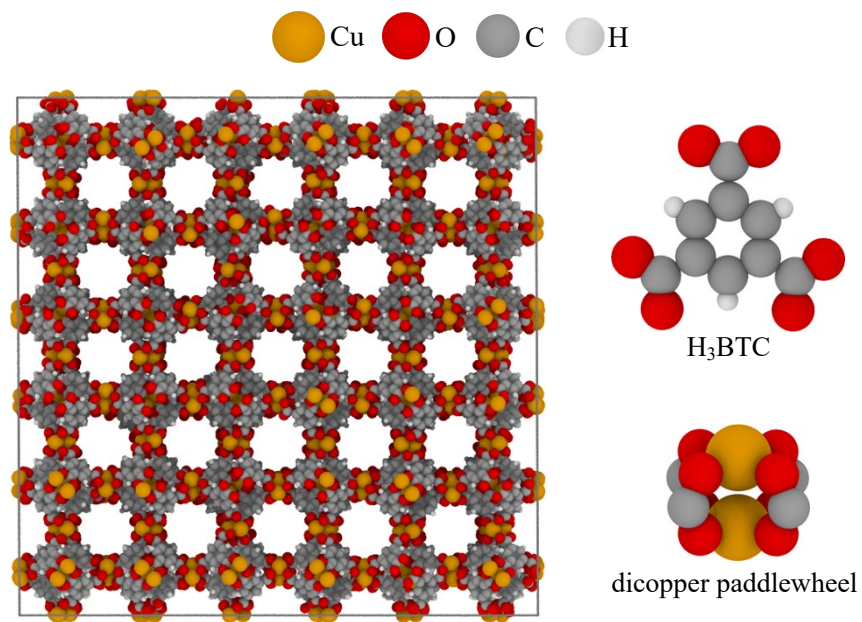

**Figure S6.** Atomistic model of HKUST-1 together with its building units.

## Supplementary table

**Table S1.** The fitting parameter  $B$  in the Wachtman's formula for the present HKUST-1 and other traditional materials.

| Material  | $B$ (GPa °C <sup>-1</sup> ) | Reference |
|-----------|-----------------------------|-----------|
| HKUST-1   | 0.030                       | This work |
| Aluminium | 0.041                       | a         |
| Copper    | 0.038                       | b         |
| Gold      | 0.020                       | c         |
| Silver    | 0.013                       | c         |
| Silicon   | 0.011                       | d         |
| AlN       | 0.024                       | e         |

<sup>a</sup>Kamn, C. N.; Alers, G. A. *J. Appl. Phys.* 1964, 35, 327

<sup>b</sup>Overton Jr., W. C.; Gaffney, J. *Phys. Rev.* 1955, 98, 969

<sup>c</sup>Neighbours, J. R.; Alers, G. A. *Phys. Rev.* 1958, 111, 707

<sup>d</sup>McSkimin, H. J. *J. Appl. Phys.* 1953, 24, 988

<sup>e</sup>Bruls, R. J.; Hintzen, H. T.; de With, G.; Metselaar, R. *J. Eur. Ceram. Soc.* 2001, 21, 263
